# Supplementary material for: The effects of glycaemic variability on intimal hyperplasia and plaque stability after stenting via autophagy-mediated G3BP1/NLRP3 inflammasome
Source: PubMed Central journal article supplement — Ann Transl Med. 2020 Nov;8(21):1388. doi: 10.21037/atm-20-4818 (PMC7723640; doi:10.21037/atm-20-4818), 2020-11
Supplement: atm-08-21-1388-dss.pdf [file atm-08-21-1388-dss.pdf]

## Data Sharing Statement

|                     |                                                                                                                                                    |                                                                                                                  |
|---------------------|----------------------------------------------------------------------------------------------------------------------------------------------------|------------------------------------------------------------------------------------------------------------------|
| <b>Article Info</b> | <a href="http://dx.doi.org/10.21037/atm-20-4818">http://dx.doi.org/10.21037/atm-20-4818</a>                                                        |                                                                                                                  |
| <b>Item</b>         | <b>Question</b>                                                                                                                                    | <b>Authors' Response<br/>(place "-" if not applicable)</b>                                                       |
| 1                   | Would you like to share data collected for your study to others?                                                                                   | Yes                                                                                                              |
| 2                   | If not, would you like to share the reason for your decision?                                                                                      | -                                                                                                                |
| 3                   | What data in particular will be shared?                                                                                                            | Clinical and preclinical data                                                                                    |
| 4                   | Any other documents will be share? Such as study protocol, statistical analysis plan, informed consent form, clinical study report, analytic code. | study protocol                                                                                                   |
| 5                   | When will data availability begin?                                                                                                                 | From the publication date                                                                                        |
| 6                   | When will data availability end?                                                                                                                   | Half one year within the publication date                                                                        |
| 7                   | To whom will you share the data?                                                                                                                   | Cardiovascular physician                                                                                         |
| 8                   | For what type of analysis or purpose?                                                                                                              | For analysis to evaluate the data related to blood glucose variability.                                          |
| 9                   | How or where can the data/documents be obtained?                                                                                                   | Emails could be sent to the address below to obtain the shared data: xiajinggang@sina.cn                         |
| 10                  | Any other restrictions?                                                                                                                            | We may balance the potential benefits and risks for each request and then provide the data that could be shared. |
